# Supplementary material for: PbCSE1 promotes lignification during stone cell development in pear (Pyrus bretschneideri) fruit
Source: PubMed Central journal article supplement (PMC8093294; doi:10.1038/s41598-021-88825-0), 2021-05-03
Supplement: 41598_2021_88825_MOESM1_ESM.pdf [file 41598_2021_88825_MOESM1_ESM.pdf]

*PbCSE1* promotes lignification during stone cell development in  
pear (*Pyrus bretschneideri*) fruit

**Jiahui Xu<sup>1</sup>, Xingyu Tao<sup>1</sup>, Zhihua Xie<sup>1</sup>, Xin Gong<sup>1</sup>, Kaijie Qi<sup>1</sup>, Shaoling Zhang<sup>1,2</sup>,**

**Katsuhiko Shiratake<sup>3</sup>, Shutian Tao<sup>1,2\*</sup>**

<sup>1</sup>Pear Engineering Research Centre, College of Horticulture, Nanjing Agricultural University,  
Nanjing, Jiangsu Province 210095, China

<sup>2</sup>State Key Laboratory of Crop Genetics and Germplasm Enhancement, Nanjing Agricultural  
University, Nanjing, Jiangsu Province 210095, China

<sup>3</sup>Laboratory of Horticultural Science, Nagoya University, Nagoya, Japan, 464-8601

\* Correspondence: taost@njau.edu.cn; Tel: +86-025-84999961

Jiahui Xu: 1491469981@qq.com

Xingyu Tao: 2018104025@njau.edu.cn

Zhihua Xie: xzz811@126.com

Xin Gong: 2016104030@njau.edu.cn

Kaijie Qi: qikaijie@njau.edu.cn

Shaoling Zhang: slzhang@njau.edu.cn

Katsuhiko Shiratake: shira@agr.nagoya-u.ac.jp

\*Corresponding author: Shutian Tao, Centre of Pear Engineering Technology Research,

College of Horticulture, Nanjing Agricultural University, No.1 Weigang, Nanjing,  
Jiangsu, The People's Republic of China, 210095, Phone: +86-25-8439996, Fax: +86-  
25-84399961, E-mail: [taost@njau.edu.cn](mailto:taost@njau.edu.cn).

## Supplementary data

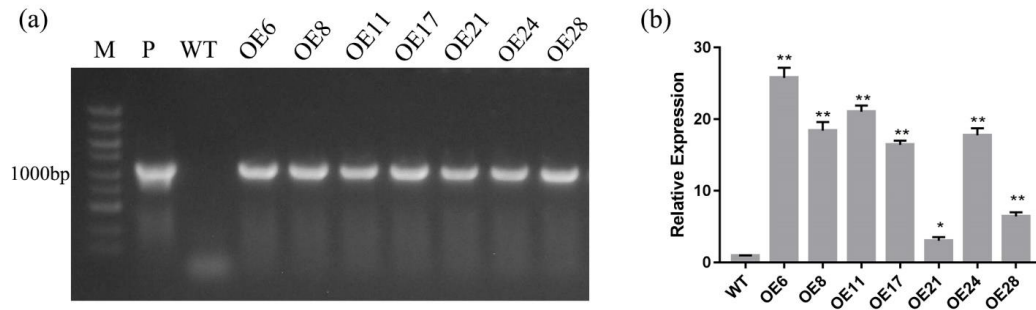

**Figure S1.** Identification of transgenic *Arabidopsis*-positive seedlings. **(a)** T1 generation positive seeding detection of *PbcSE1*. OE = overexpression, M = marker, WT = wild type, P = positive control. This is the grouping of gels cropped from different parts of the same gel. **(b)** The relative expression of *PbcSE1* in different lines of T1 positive plants.

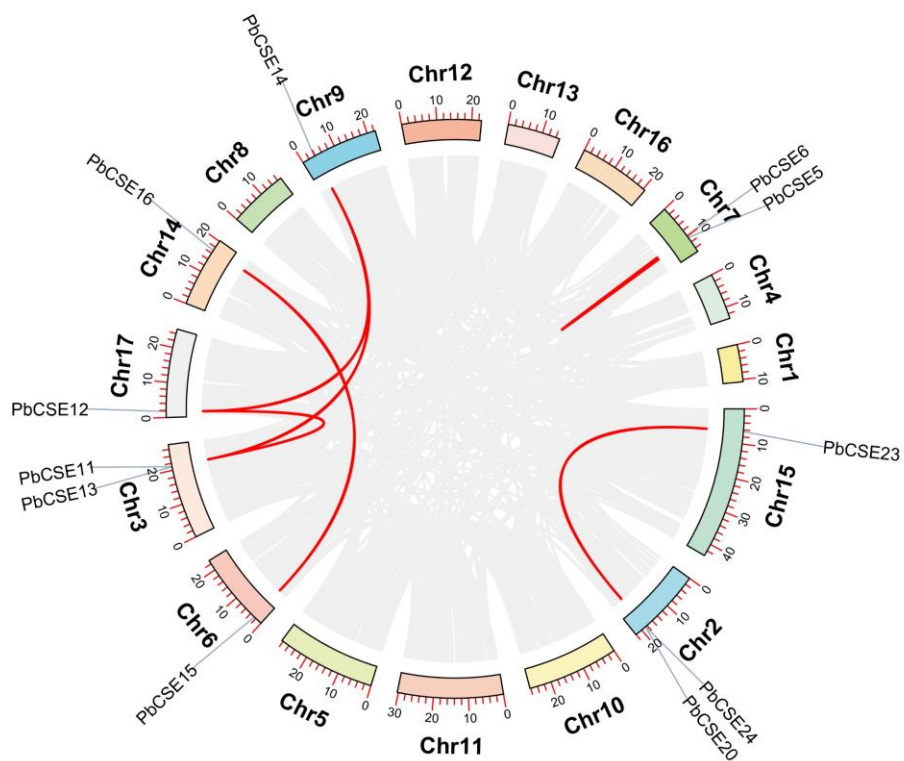

**Figure S2.** Collinear analysis of *PbCSEs*.

| No. | Gene name      | Gene ID            | Position      | Stra | Start    | End      | DNA/bp | CDS/bp |
|-----|----------------|--------------------|---------------|------|----------|----------|--------|--------|
| 1   | <i>PbCSE1</i>  | <i>Pbr002315.3</i> | Chr17         | +    | 417048   | 418317   | 1270   | 984    |
| 2   | <i>PbCSE2</i>  | <i>Pbr026316.1</i> | scaffold424.0 | -    | 38552    | 40101    | 1550   | 909    |
| 3   | <i>PbCSE3</i>  | <i>Pbr026363.1</i> | scaffold424.0 | +    | 335722   | 337270   | 1549   | 909    |
| 4   | <i>PbCSE4</i>  | <i>Pbr039057.1</i> | scaffold828.0 | -    | 51217    | 52209    | 993    | 993    |
| 5   | <i>PbCSE5</i>  | <i>Pbr032308.1</i> | Chr7          | +    | 10475405 | 10478354 | 960    | 957    |
| 6   | <i>PbCSE6</i>  | <i>Pbr026463.1</i> | Chr7          | -    | 9780086  | 9783240  | 3155   | 960    |
| 7   | <i>PbCSE7</i>  | <i>Pbr003260.1</i> | Chr11         | +    | 90243    | 91971    | 1729   | 915    |
| 8   | <i>PbCSE8</i>  | <i>Pbr042390.1</i> | Chr3          | -    | 27244839 | 27246437 | 1599   | 990    |
| 9   | <i>PbCSE9</i>  | <i>Pbr038157.1</i> | scaffold797.0 | +    | 161366   | 165308   | 3943   | 957    |
| 10  | <i>PbCSE10</i> | <i>Pbr003259.1</i> | Chr11         | +    | 78090    | 79811    | 1722   | 915    |
| 11  | <i>PbCSE11</i> | <i>Pbr013306.1</i> | Chr3          | -    | 21021920 | 21025814 | 3895   | 1284   |
| 12  | <i>PbCSE12</i> | <i>Pbr034764.1</i> | Chr17         | +    | 1718219  | 1722403  | 4185   | 1059   |
| 13  | <i>PbCSE13</i> | <i>Pbr013307.2</i> | Chr3          | +    | 21019023 | 21021277 | 2255   | 1281   |
| 14  | <i>PbCSE14</i> | <i>Pbr032606.2</i> | Chr9          | +    | 3640437  | 3644791  | 4355   | 930    |
| 15  | <i>PbCSE15</i> | <i>Pbr028331.1</i> | Chr6          | +    | 2620950  | 2625674  | 4725   | 1458   |
| 16  | <i>PbCSE16</i> | <i>Pbr038811.1</i> | Chr14         | +    | 16893331 | 16898472 | 5142   | 1443   |
| 17  | <i>PbCSE17</i> | <i>Pbr008780.1</i> | Chr15         | -    | 8768139  | 8770533  | 2395   | 1155   |
| 18  | <i>PbCSE18</i> | <i>Pbr002316.1</i> | Chr17         | +    | 418552   | 419030   | 479    | 387    |
| 19  | <i>PbCSE19</i> | <i>Pbr000313.1</i> | Chr5          | +    | 26316512 | 26317545 | 1034   | 966    |
| 20  | <i>PbCSE20</i> | <i>Pbr041464.1</i> | Chr2          | +    | 18579530 | 18584136 | 4607   | 1599   |
| 21  | <i>PbCSE21</i> | <i>Pbr027746.2</i> | Chr2          | -    | 16457823 | 16459791 | 1969   | 879    |
| 22  | <i>PbCSE22</i> | <i>Pbr015620.1</i> | Chr15         | +    | 14831830 | 14833767 | 1938   | 810    |
| 23  | <i>PbCSE23</i> | <i>Pbr042754.1</i> | Chr15         | +    | 6452652  | 6454811  | 2160   | 873    |
| 24  | <i>PbCSE24</i> | <i>Pbr041469.2</i> | Chr2          | +    | 18552536 | 18554396 | 1861   | 678    |

Table S1. Information of 24 *CSE* genes in pear.

| Gene name             | Primer sequences (5'-3')                    | Application | Note                                                                                                                                                                  |                                                                                                                                                                           |
|-----------------------|---------------------------------------------|-------------|-----------------------------------------------------------------------------------------------------------------------------------------------------------------------|---------------------------------------------------------------------------------------------------------------------------------------------------------------------------|
| P1300- <i>PbCSE1F</i> | GAGAACACGGGGGACTCTAGAATGGTCATGTACTTCCAATCCC | cDNA        | Used in this study                                                                                                                                                    |                                                                                                                                                                           |
| P1300- <i>PbCSE1R</i> | GCCCTTGCTCACCATGGATCCTCAAATTCCTCCTCCAAGCC   | cloning     |                                                                                                                                                                       |                                                                                                                                                                           |
| <i>PbCSE-1F</i>       | ATGGTCATGTACTTCCAATCCC                      | qRT-PCR     |                                                                                                                                                                       |                                                                                                                                                                           |
| <i>PbCSE-1R</i>       | GGACTTTGCTGGGCTTCAT                         |             |                                                                                                                                                                       |                                                                                                                                                                           |
| <i>PbCSE-18F</i>      | ATGGACTACGTAGAATTCCTTTG                     |             |                                                                                                                                                                       |                                                                                                                                                                           |
| <i>PbCSE-18R</i>      | CCCTATCCGTCGTCCCGTGT                        |             |                                                                                                                                                                       |                                                                                                                                                                           |
| <i>ATC4H-F</i>        | GGGAGAAATCAACGAGGACA                        |             | The genes selected for expression analysis have been previously shown to be highly expressed in stems where lignified fibers and vessels are abundant <sup>14</sup> . |                                                                                                                                                                           |
| <i>ATC4H-R</i>        | CACGTGCGATTCTTCTCAA                         |             |                                                                                                                                                                       |                                                                                                                                                                           |
| <i>AT4CL-1F</i>       | GATGCCGTTAATGCCAAGTT                        |             |                                                                                                                                                                       |                                                                                                                                                                           |
| <i>AT4CL-1R</i>       | ACCGATGAGCAAAGCCTCTA                        |             |                                                                                                                                                                       |                                                                                                                                                                           |
| <i>ATC3H-1F</i>       | TTTCGTTGATGCGTTGCTAA                        |             |                                                                                                                                                                       |                                                                                                                                                                           |
| <i>ATC3H-1R</i>       | CGGTCAAGTCCAACCACTCT                        |             |                                                                                                                                                                       |                                                                                                                                                                           |
| <i>ATCOMT-F</i>       | TAGCCAGTGCTTCCGTTCTT                        |             |                                                                                                                                                                       |                                                                                                                                                                           |
| <i>ATCOMT-R</i>       | CTAGGGTCAGTCCCGTGGA                         |             |                                                                                                                                                                       |                                                                                                                                                                           |
| <i>ATHCT-F</i>        | TTGTCATCCCAGATTCCAT                         |             |                                                                                                                                                                       |                                                                                                                                                                           |
| <i>ATHCT-R</i>        | CCACAACGAAGAGAACACCA                        |             |                                                                                                                                                                       |                                                                                                                                                                           |
| <i>ATF5H-1F</i>       | ATGATGGGGATGTTGTCGAT                        |             |                                                                                                                                                                       |                                                                                                                                                                           |
| <i>ATF5H-1R</i>       | CGTCCATGATGATTGCTTTG                        |             |                                                                                                                                                                       |                                                                                                                                                                           |
| <i>ATCCR-1F</i>       | AGGGGCTCAAATCCTCTCTC                        |             |                                                                                                                                                                       |                                                                                                                                                                           |
| <i>ATCCR-1R</i>       | GCGATGGAATAAAGGCAAGA                        |             |                                                                                                                                                                       |                                                                                                                                                                           |
| <i>ATCAD-6F</i>       | GTCCACTGAGCCACTTTGGT                        |             |                                                                                                                                                                       |                                                                                                                                                                           |
| <i>ATCAD-6R</i>       | CCCAAGCATAAGCAGAGGAG                        |             |                                                                                                                                                                       |                                                                                                                                                                           |
| <i>ATPAL-1F</i>       | GGATTTTCCGGTATCCGATT                        |             |                                                                                                                                                                       |                                                                                                                                                                           |
| <i>ATPAL-1R</i>       | CACTCATCACCTCTGCGAAA                        |             |                                                                                                                                                                       |                                                                                                                                                                           |
| <i>PbCAD-F</i>        | CCTCCTTGTTGGTTGCTGC                         |             |                                                                                                                                                                       | The genes selected for expression analysis have been previously shown to be highly expressed in the stems where lignified fibers and vessels are abundant <sup>13</sup> . |
| <i>PbCAD-R</i>        | CCGCCTGGGTGGTTTT                            |             |                                                                                                                                                                       |                                                                                                                                                                           |
| <i>PbCCOMT-2F</i>     | TACCCAAGGGAGCCTGAATC                        |             |                                                                                                                                                                       |                                                                                                                                                                           |
| <i>PbCCOMT-2R</i>     | AGTAGCCAGTGTAGACCCCAATC                     |             |                                                                                                                                                                       |                                                                                                                                                                           |
| <i>PbC3H-1F</i>       | TGATTACTGCGGGTATGGACA                       |             |                                                                                                                                                                       |                                                                                                                                                                           |
| <i>PbC3H-1R</i>       | AGCATTAGTGGTGTGGAGGG                        |             |                                                                                                                                                                       |                                                                                                                                                                           |
| <i>PbC3H-2F</i>       | GAGTCCGACCCGAAAGGT                          |             |                                                                                                                                                                       |                                                                                                                                                                           |
| <i>PbC3H-2R</i>       | ATAGGTGGCCCAACATAGAGG                       |             |                                                                                                                                                                       |                                                                                                                                                                           |
| <i>Pb4CL-1F</i>       | CTTGGACAGGGGTATGGAATG                       |             |                                                                                                                                                                       |                                                                                                                                                                           |
| <i>Pb4CL-1R</i>       | AGCGAAGCACCCGTATCAG                         |             |                                                                                                                                                                       |                                                                                                                                                                           |
| <i>Pb4CL-2F</i>       | CCTACCAATCTCATGCCGTCT                       |             |                                                                                                                                                                       |                                                                                                                                                                           |
| <i>Pb4CL-2R</i>       | GGTTCTGGAAGCAGTAGCTGTG                      |             |                                                                                                                                                                       |                                                                                                                                                                           |
| <i>PbHCT-2F</i>       | GACGCCAAAGAAGGCACTG                         |             |                                                                                                                                                                       |                                                                                                                                                                           |
| <i>PbHCT-2R</i>       | GGGTAGAACGGCACAAGAGC                        |             |                                                                                                                                                                       |                                                                                                                                                                           |
| <i>PbHCT-4F</i>       | GACCCACCTCAGACAACATT                        |             |                                                                                                                                                                       |                                                                                                                                                                           |
| <i>PbHCT-4R</i>       | CGTCAAGACGCTTAGTTGCTCCC                     |             |                                                                                                                                                                       |                                                                                                                                                                           |

Table S2. Sequences of the gene-specific primers used in this work.

| Code               | name           | evalue    | with        | Chr  | head     | end      | chain |
|--------------------|----------------|-----------|-------------|------|----------|----------|-------|
|                    |                |           | AT1G52760.1 |      |          |          |       |
| <i>Ro06_G16613</i> | <i>RoCSE1</i>  | 0         |             | Ro06 | 11766242 | 11767225 | +     |
| <i>Ro05_G14831</i> | <i>RoCSE2</i>  | 1.60E-168 |             | Ro05 | 8388911  | 8389882  | -     |
| <i>Ro03_G06463</i> | <i>RoCSE3</i>  | 3.21E-92  |             | Ro03 | 41371272 | 41372237 | +     |
| <i>Ro02_G01341</i> | <i>RoCSE4</i>  | 2.13E-64  |             | Ro02 | 7555107  | 7562042  | +     |
| <i>Ro07_G22034</i> | <i>RoCSE5</i>  | 3.01E-60  |             | Ro07 | 33308609 | 33309595 | +     |
| <i>Ro04_G02691</i> | <i>RoCSE6</i>  | 4.61E-60  |             | Ro04 | 4776071  | 4780782  | -     |
| <i>Ro03_G26661</i> | <i>RoCSE7</i>  | 4.83E-60  |             | Ro03 | 23741694 | 23743524 | -     |
| <i>Ro01_G00832</i> | <i>RoCSE8</i>  | 1.64E-58  |             | Ro01 | 2927160  | 2928092  | +     |
| <i>Ro04_G36219</i> | <i>RoCSE9</i>  | 4.07E-57  |             | Ro04 | 4772872  | 4775565  | -     |
| <i>Ro07_G18799</i> | <i>RoCSE10</i> | 1.24E-56  |             | Ro07 | 34342592 | 34356142 | +     |
| <i>Ro05_G03655</i> | <i>RoCSE11</i> | 1.29E-40  |             | Ro05 | 424656   | 429569   | -     |
| <i>Ro02_G00679</i> | <i>RoCSE12</i> | 5.82E-30  |             | Ro02 | 2895098  | 2897978  | -     |
| <i>Ro06_G04873</i> | <i>RoCSE13</i> | 0.001     |             | Ro06 | 23003354 | 23007264 | -     |
| <i>Ro04_G02559</i> | <i>RoCSE14</i> | 0.002     |             | Ro04 | 3973434  | 3976314  | +     |
| <i>Ro05_G13809</i> | <i>RoCSE15</i> | 0.003     |             | Ro05 | 13203890 | 13209783 | +     |
| <i>AT1G52760.1</i> | <i>ATCSE1</i>  | 0         |             | Chr1 | 19651325 | 19652743 | +     |
| <i>AT1G11090.1</i> | <i>ATCSE2</i>  | 1.79E-90  |             | Chr1 | 3702608  | 3703779  | +     |
| <i>AT3G62860.1</i> | <i>ATCSE3</i>  | 1.79E-67  |             | Chr3 | 23239446 | 23242251 | -     |
| <i>AT2G47630.1</i> | <i>ATCSE4</i>  | 1.11E-64  |             | Chr2 | 19534503 | 19537014 | +     |
| <i>AT5G14980.1</i> | <i>ATCSE5</i>  | 2.83E-64  |             | Chr5 | 4849600  | 4850583  | +     |
| <i>AT3G55190.1</i> | <i>ATCSE6</i>  | 4.96E-63  |             | Chr3 | 20458007 | 20459890 | +     |
| <i>AT2G39420.1</i> | <i>ATCSE7</i>  | 9.88E-63  |             | Chr2 | 16460364 | 16463061 | +     |
| <i>AT3G62860.2</i> | <i>ATCSE8</i>  | 1.63E-61  |             | Chr3 | 23239264 | 23242274 | -     |
| <i>AT5G16120.1</i> | <i>ATCSE9</i>  | 5.78E-59  |             | Chr5 | 5265939  | 5267979  | +     |
| <i>AT5G16120.3</i> | <i>ATCSE10</i> | 5.78E-59  |             | Chr5 | 5265473  | 5267954  | +     |
| <i>AT2G47630.2</i> | <i>ATCSE11</i> | 1.12E-58  |             | Chr2 | 19534503 | 19537014 | +     |
| <i>AT5G16120.2</i> | <i>ATCSE12</i> | 1.21E-58  |             | Chr5 | 5265633  | 5267916  | +     |
| <i>AT5G16120.4</i> | <i>ATCSE13</i> | 1.43E-58  |             | Chr5 | 5265617  | 5268078  | +     |
| <i>AT2G47630.3</i> | <i>ATCSE14</i> | 1.96E-58  |             | Chr2 | 19535143 | 19537014 | +     |
| <i>AT1G77420.1</i> | <i>ATCSE15</i> | 5.47E-58  |             | Chr1 | 29093499 | 29095716 | +     |
| <i>AT2G39400.1</i> | <i>ATCSE16</i> | 3.82E-57  |             | Chr2 | 16452612 | 16454801 | +     |
| <i>AT5G19290.1</i> | <i>ATCSE17</i> | 3.36E-54  |             | Chr5 | 6494055  | 6495284  | +     |
| <i>AT3G55180.1</i> | <i>ATCSE18</i> | 6.53E-52  |             | Chr3 | 20454903 | 20456682 | +     |
| <i>AT5G11650.1</i> | <i>ATCSE19</i> | 6.55E-45  |             | Chr5 | 3744980  | 3747125  | +     |
| <i>AT1G73480.1</i> | <i>ATCSE20</i> | 2.80E-42  |             | Chr1 | 27628939 | 27632806 | +     |
| <i>AT1G18360.1</i> | <i>ATCSE21</i> | 1.26E-37  |             | Chr1 | 6316695  | 6319427  | -     |
| <i>AT2G39400.2</i> | <i>ATCSE22</i> | 1.46E-32  |             | Chr2 | 16452612 | 16454801 | +     |
| <i>AT5G11650.2</i> | <i>ATCSE23</i> | 1.82E-23  |             | Chr5 | 3744980  | 3747149  | +     |
| <i>AT2G19550.1</i> | <i>ATCSE24</i> | 3.02E-07  |             | Chr2 | 8464533  | 8465531  | -     |
| <i>AT3G47590.1</i> | <i>ATCSE25</i> | 4.03E-05  |             | Chr3 | 17535759 | 17537530 | -     |
| <i>AT5G38220.3</i> | <i>ATCSE26</i> | 5.13E-05  |             | Chr5 | 15268827 | 15271386 | +     |

|                    |                |           |                |          |          |   |
|--------------------|----------------|-----------|----------------|----------|----------|---|
| <i>AT5G38220.1</i> | <i>ATCSE27</i> | 5.13E-05  | Chr5           | 15268868 | 15271353 | + |
| <i>AT1G13610.1</i> | <i>ATCSE28</i> | 0.001     | Chr1           | 4663831  | 4666017  | - |
| <i>PCP011849.1</i> | <i>PCCSE1</i>  | 2.05E-90  | scaffold00368  | 36096    | 37366    | + |
| <i>PCP007413.1</i> | <i>PCCSE2</i>  | 4.92E-65  | scaffold00865  | 23689    | 26167    | - |
| <i>PCP015174.1</i> | <i>PCCSE3</i>  | 4.98E-63  | scaffold00530  | 135736   | 136870   | + |
| <i>PCP044524.1</i> | <i>PCCSE4</i>  | 4.47E-62  | scaffold00438  | 134353   | 137592   | + |
| <i>PCP027588.1</i> | <i>PCCSE5</i>  | 4.98E-60  | scaffold00158  | 58697    | 64117    | - |
| <i>PCP033740.1</i> | <i>PCCSE6</i>  | 3.16E-59  | scaffold00007  | 225900   | 228311   | - |
| <i>PCP044496.1</i> | <i>PCCSE7</i>  | 1.64E-54  | scaffold00388  | 47387    | 51504    | + |
| <i>PCP033156.1</i> | <i>PCCSE8</i>  | 2.83E-53  | scaffold00325  | 230224   | 233098   | - |
| <i>PCP045179.1</i> | <i>PCCSE9</i>  | 3.29E-50  | scaffold03738  | 2222     | 6678     | + |
| <i>PCP037709.1</i> | <i>PCCSE10</i> | 6.25E-46  | scaffold138019 | 234      | 500      | - |
| <i>PCP027928.1</i> | <i>PCCSE11</i> | 1.06E-43  | scaffold00498  | 127037   | 131727   | - |
| <i>PCP006868.1</i> | <i>PCCSE12</i> | 1.33E-42  | scaffold00145  | 203696   | 206600   | + |
| <i>PCP025117.1</i> | <i>PCCSE13</i> | 2.29E-41  | scaffold01196  | 66956    | 71990    | + |
| <i>PCP030138.1</i> | <i>PCCSE14</i> | 6.61E-36  | scaffold09319  | 716      | 3220     | + |
| <i>PCP040027.1</i> | <i>PCCSE15</i> | 5.37E-35  | scaffold16147  | 388      | 1648     | - |
| <i>PCP020858.1</i> | <i>PCCSE16</i> | 8.25E-14  | scaffold00014  | 189066   | 193379   | + |
| <i>PCP005039.1</i> | <i>PCCSE17</i> | 8.75E-05  | scaffold00004  | 783386   | 787490   | + |
| <i>PCP004967.1</i> | <i>PCCSE18</i> | 0.000642  | scaffold00004  | 71986    | 74453    | + |
| <i>PCP001353.1</i> | <i>PCCSE19</i> | 0.001     | scaffold02861  | 5956     | 8500     | + |
| <i>Pbr002315.3</i> | <i>PbCSE1</i>  | 4.84E-109 | Chr17          | 417048   | 418317   | + |
| <i>Pbr026316.1</i> | <i>PbCSE2</i>  | 6.44E-65  | scaffold424.0  | 38552    | 40101    | - |
| <i>Pbr026363.1</i> | <i>PbCSE3</i>  | 6.44E-65  | scaffold424.0  | 335722   | 337270   | + |
| <i>Pbr039057.1</i> | <i>PbCSE4</i>  | 4.80E-64  | scaffold828.0  | 51217    | 52209    | - |
| <i>Pbr032308.1</i> | <i>PbCSE5</i>  | 5.88E-63  | Chr7           | 10475405 | 10478354 | + |
| <i>Pbr026463.1</i> | <i>PbCSE6</i>  | 6.61E-63  | Chr7           | 9780086  | 9783240  | - |
| <i>Pbr003260.1</i> | <i>PbCSE7</i>  | 9.80E-63  | Chr11          | 90243    | 91971    | + |
| <i>Pbr042390.1</i> | <i>PbCSE8</i>  | 2.43E-62  | Chr3           | 27244839 | 27246437 | - |
| <i>Pbr038157.1</i> | <i>PbCSE9</i>  | 2.76E-62  | scaffold797.0  | 161366   | 165308   | + |
| <i>Pbr003259.1</i> | <i>PbCSE10</i> | 7.97E-60  | Chr11          | 78090    | 79811    | + |
| <i>Pbr013306.1</i> | <i>PbCSE11</i> | 7.77E-58  | Chr3           | 21021920 | 21025814 | + |
| <i>Pbr034764.1</i> | <i>PbCSE12</i> | 1.68E-54  | Chr17          | 1718219  | 1722403  | + |
| <i>Pbr013307.2</i> | <i>PbCSE13</i> | 3.03E-52  | Chr3           | 21019023 | 21021277 | + |
| <i>Pbr032606.2</i> | <i>PbCSE14</i> | 2.97E-50  | Chr9           | 3640437  | 3644791  | + |
| <i>Pbr028331.1</i> | <i>PbCSE15</i> | 5.67E-45  | Chr6           | 2620950  | 2625674  | + |
| <i>Pbr038811.1</i> | <i>PbCSE16</i> | 1.34E-43  | Chr14          | 16893331 | 16898472 | + |
| <i>Pbr008780.1</i> | <i>PbCSE17</i> | 2.15E-42  | Chr15          | 8768139  | 8770533  | - |
| <i>Pbr002316.1</i> | <i>PbCSE18</i> | 2.24E-40  | Chr17          | 418552   | 419030   | + |
| <i>Pbr000313.1</i> | <i>PbCSE19</i> | 5.59E-14  | Chr5           | 26316512 | 26317545 | + |
| <i>Pbr041464.1</i> | <i>PbCSE20</i> | 0.000102  | Chr2           | 18579530 | 18584136 | + |
| <i>Pbr027746.2</i> | <i>PbCSE21</i> | 0.000329  | Chr2           | 16457823 | 16459791 | - |
| <i>Pbr015620.1</i> | <i>PbCSE22</i> | 0.003     | Chr15          | 14831830 | 14833767 | + |
| <i>Pbr042754.1</i> | <i>PbCSE23</i> | 0.004     | Chr15          | 6452652  | 6454811  | + |



|                       |                |          |             |          |          |   |
|-----------------------|----------------|----------|-------------|----------|----------|---|
| <i>Pbr041469.2</i>    | <i>PbCSE24</i> | 0.006    | Chr2        | 18552536 | 18554396 | + |
| <i>FvH4_6g30610.1</i> | <i>FvCSE1</i>  | 0        | Fvb6        | 23705862 | 23706851 | + |
| <i>FvH4_3g04590.1</i> | <i>FvCSE2</i>  | 5.16E-94 | Fvb3        | 2627189  | 2628148  | - |
| <i>FvH4_2g25730.1</i> | <i>FvCSE3</i>  | 5.01E-71 | Fvb2        | 20784936 | 20788630 | - |
| <i>FvH4_1g06460.1</i> | <i>FvCSE4</i>  | 2.30E-65 | Fvb1        | 3410244  | 3411131  | + |
| <i>FvH4_3g25850.1</i> | <i>FvCSE5</i>  | 6.85E-63 | Fvb3        | 18696258 | 18700846 | + |
| <i>FvH4_7g20970.1</i> | <i>FvCSE6</i>  | 7.23E-63 | Fvb7        | 16931877 | 16934612 | + |
| <i>FvH4_7g19610.1</i> | <i>FvCSE7</i>  | 1.44E-61 | Fvb7        | 16116600 | 16117586 | + |
| <i>FvH4_4g27270.1</i> | <i>FvCSE8</i>  | 7.29E-56 | Fvb4        | 28329851 | 28332764 | + |
| <i>FvH4_4g27260.1</i> | <i>FvCSE9</i>  | 5.27E-52 | Fvb4        | 28326839 | 28329151 | + |
| <i>FvH4_2g35400.1</i> | <i>FvCSE10</i> | 1.08E-42 | Fvb2        | 26111866 | 26114552 | + |
| <i>FvH4_5g17790.1</i> | <i>FvCSE11</i> | 1.56E-40 | Fvb5        | 10193910 | 10199657 | + |
| <i>MD10G1300100</i>   | <i>MDCSE1</i>  | 4.88E-93 | Chr10       | 38745228 | 38746256 | + |
| <i>MD03G1288300</i>   | <i>MDCSE2</i>  | 5.14E-70 | Chr03       | 36701304 | 36707923 | - |
| <i>MD11G1309800</i>   | <i>MDCSE3</i>  | 6.17E-70 | Chr11       | 42315614 | 42319994 | + |
| <i>MD07G1174800</i>   | <i>MDCSE4</i>  | 2.34E-64 | Chr07       | 25347166 | 25348158 | + |
| <i>MD01G1108700</i>   | <i>MDCSE5</i>  | 8.68E-63 | Chr01       | 22157195 | 22160070 | + |
| <i>MD01G1119700</i>   | <i>MDCSE6</i>  | 6.48E-62 | Chr01       | 23347436 | 23351576 | + |
| <i>MD07G1188700</i>   | <i>MDCSE7</i>  | 7.29E-61 | Chr07       | 26945274 | 26948322 | + |
| <i>MD16G1042000</i>   | <i>MDCSE8</i>  | 3.48E-59 | Chr16       | 2958014  | 2960730  | + |
| <i>MD09G1252900</i>   | <i>MDCSE9</i>  | 3.88E-59 | Chr09       | 32405681 | 32410472 | + |
| <i>MD16G1041900</i>   | <i>MDCSE10</i> | 5.16E-57 | Chr16       | 2949505  | 2957478  | + |
| <i>MD17G1244600</i>   | <i>MDCSE11</i> | 4.05E-55 | Chr17       | 29299235 | 29304001 | + |
| <i>MD06G1233800</i>   | <i>MDCSE12</i> | 6.15E-45 | Chr06       | 36502108 | 36507270 | + |
| <i>MD14G1240600</i>   | <i>MDCSE13</i> | 3.57E-44 | Chr14       | 31950828 | 31955830 | + |
| <i>MD15G1091700</i>   | <i>MDCSE14</i> | 5.46E-43 | Chr15       | 6363670  | 6366529  | - |
| <i>MD08G1112500</i>   | <i>MDCSE15</i> | 9.56E-43 | Chr08       | 9940108  | 9943040  | - |
| <i>MD05G1322100</i>   | <i>MDCSE16</i> | 4.92E-36 | Chr05       | 44952957 | 44953682 | + |
| <i>MD02G1199900</i>   | <i>MDCSE17</i> | 8.14E-21 | Chr02       | 19673208 | 19685871 | + |
| <i>MD13G1040700</i>   | <i>MDCSE18</i> | 1.06E-17 | Chr13       | 2793374  | 2794551  | + |
| <i>MD07G1114200</i>   | <i>MDCSE19</i> | 9.30E-09 | Chr07       | 13683967 | 13684221 | - |
| <i>MD15G1213300</i>   | <i>MDCSE20</i> | 0.000565 | Chr15       | 17118247 | 17121661 | - |
| <i>MD02G1086100</i>   | <i>MDCSE21</i> | 0.000726 | Chr02       | 6755952  | 6759379  | - |
| <i>Pm023999</i>       | <i>PmCSE1</i>  | 0        | Pm7         | 9815109  | 9816062  | + |
| <i>Pm009952</i>       | <i>PmCSE2</i>  | 1.17E-92 | Pm3         | 1803044  | 1804012  | - |
| <i>Pm020027</i>       | <i>PmCSE3</i>  | 9.56E-71 | Pm6         | 814185   | 817561   | - |
| <i>Pm029072</i>       | <i>PmCSE4</i>  | 1.60E-59 | scaffold205 | 1234119  | 1236150  | - |
| <i>Pm018723</i>       | <i>PmCSE5</i>  | 1.37E-58 | Pm5         | 20230879 | 20232937 | + |
| <i>Pm029071</i>       | <i>PmCSE6</i>  | 9.91E-58 | scaffold205 | 1230266  | 1233383  | - |
| <i>Pm029516</i>       | <i>PmCSE7</i>  | 1.18E-48 | scaffold266 | 59987    | 68462    | + |
| <i>Pm016617</i>       | <i>PmCSE8</i>  | 1.99E-45 | Pm5         | 3188067  | 3193518  | + |
| <i>Pm025280</i>       | <i>PmCSE9</i>  | 6.99E-45 | Pm7         | 16912167 | 16917837 | - |
| <i>Pm005167</i>       | <i>PmCSE10</i> | 4.19E-44 | Pm2         | 9611910  | 9614332  | + |
| <i>Pm005170</i>       | <i>PmCSE11</i> | 8.00E-44 | Pm2         | 9617300  | 9620160  | + |

|                                   |                |           |              |          |          |   |
|-----------------------------------|----------------|-----------|--------------|----------|----------|---|
| <i>Pm018540</i>                   | <i>PmCSE12</i> | 1.01E-31  | Pm5          | 19077991 | 19078641 | + |
| <i>Pm009567</i>                   | <i>PmCSE13</i> | 2.78E-16  | Pm2          | 41863844 | 41865065 | - |
| <i>Prupe.5G109300.1.p</i>         | <i>PrCSE1</i>  | 0         | Pp05         | 11444294 | 11446331 | - |
| <i>Prupe.4G040700.1.p</i>         | <i>PrCSE2</i>  | 7.19E-93  | Pp04         | 1914947  | 1915966  | - |
| <i>Prupe.8G261500.1.p</i>         | <i>PrCSE3</i>  | 1.74E-69  | Pp08         | 22077044 | 22081224 | - |
| <i>Prupe.1G312200.1.p</i>         | <i>PrCSE4</i>  | 1.11E-62  | Pp01         | 30291520 | 30293997 | - |
| <i>Prupe.3G157400.1.p</i>         | <i>PrCSE5</i>  | 1.39E-60  | Pp03         | 17594861 | 17600504 | + |
| <i>Prupe.2G213900.1.p</i>         | <i>PrCSE6</i>  | 1.46E-59  | Pp02         | 24528305 | 24529492 | + |
| <i>Prupe.2G226400.1.p</i>         | <i>PrCSE7</i>  | 4.01E-58  | Pp02         | 25287132 | 25290401 | + |
| <i>Prupe.1G312100.1.p</i>         | <i>PrCSE8</i>  | 3.71E-56  | Pp01         | 30287567 | 30291123 | - |
| <i>Prupe.5G238400.1.p</i>         | <i>PrCSE9</i>  | 2.41E-44  | Pp05         | 18014196 | 18021043 | + |
| <i>Prupe.1G446700.1.p</i>         | <i>PrCSE10</i> | 3.10E-44  | Pp01         | 37773754 | 37776527 | - |
| <i>Prupe.3G146300.1.p</i>         | <i>PrCSE11</i> | 0.000867  | Pp03         | 16001002 | 16007939 | - |
| <i>Potri.003G059200.1.p</i>       | <i>PoCSE1</i>  | 0         | Chr03        | 8590854  | 8593871  | - |
| <i>Potri.001G175000.1.p</i>       | <i>PoCSE2</i>  | 0         | Chr01        | 15048240 | 15050382 | + |
| <i>Potri.011G046500.1.p</i>       | <i>PoCSE3</i>  | 3.16E-88  | Chr11        | 3644103  | 3645413  | - |
| <i>Potri.014G129000.1.p</i>       | <i>PoCSE4</i>  | 7.99E-69  | Chr14        | 8649670  | 8654120  | + |
| <i>Potri.002G204200.1.p</i>       | <i>PoCSE5</i>  | 1.33E-67  | Chr02        | 16884483 | 16888166 | + |
| <i>Potri.017G114800.4.p</i>       | <i>PoCSE6</i>  | 5.13E-63  | Chr17        | 12241178 | 12246057 | + |
| <i>Potri.017G114800.1.p</i>       | <i>PoCSE7</i>  | 1.90E-62  | Chr17        | 12241178 | 12246057 | + |
| <i>Potri.010G212200.1.p</i>       | <i>PoCSE8</i>  | 7.32E-62  | Chr10        | 20049814 | 20052628 | - |
| <i>Potri.014G129000.3.p</i>       | <i>PoCSE9</i>  | 3.58E-61  | Chr14        | 8649670  | 8654120  | + |
| <i>Potri.001G466700.1.p</i>       | <i>PoCSE10</i> | 4.96E-60  | Chr01        | 49157554 | 49158555 | - |
| <i>Potri.008G040000.1.p</i>       | <i>PoCSE11</i> | 2.03E-58  | Chr08        | 2237952  | 2239498  | + |
| <i>Potri.008G049000.1.p</i>       | <i>PoCSE12</i> | 2.87E-58  | Chr08        | 2864262  | 2867016  | + |
| <i>Potri.010G222300.1.p</i>       | <i>PoCSE13</i> | 4.67E-57  | Chr10        | 20700091 | 20701440 | - |
| <i>Potri.010G124000.1.p</i>       | <i>PoCSE14</i> | 7.03E-57  | Chr10        | 14172963 | 14177362 | + |
| <i>Potri.018G045800.1.p</i>       | <i>PoCSE15</i> | 3.48E-45  | Chr18        | 3910067  | 3913772  | + |
| <i>Potri.006G237200.2.p</i>       | <i>PoCSE16</i> | 1.21E-43  | Chr06        | 23907564 | 23911467 | - |
| <i>Potri.012G041800.7.p</i>       | <i>PoCSE17</i> | 3.00E-43  | Chr12        | 3721495  | 3727269  | - |
| <i>Potri.012G041800.1.p</i>       | <i>PoCSE18</i> | 7.11E-43  | Chr12        | 3720119  | 3727203  | - |
| <i>Potri.015G031900.4.p</i>       | <i>PoCSE19</i> | 4.79E-41  | Chr15        | 2455509  | 2461298  | + |
| <i>Potri.011G164300.2.p</i>       | <i>PoCSE20</i> | 2.82E-34  | Chr11        | 18125120 | 18125483 | - |
| <i>Potri.012G041800.2.p</i>       | <i>PoCSE21</i> | 2.19E-17  | Chr12        | 3756797  | 3763917  | - |
| <i>Potri.004G099700.1.p</i>       | <i>PoCSE22</i> | 1.29E-10  | Chr04        | 8612851  | 8612982  | - |
| <i>Potri.004G097300.1.p</i>       | <i>PoCSE23</i> | 0.000174  | Chr04        | 8612851  | 8614187  | + |
| <i>Pav_sc0000869.1_g590.1.mk</i>  | <i>PaCSE1</i>  | 5.49E-170 | PAV_r1.0chr5 | 8962318  | 8963124  | - |
| <i>Pav_sc0000130.1_g1060.1.mk</i> | <i>PaCSE2</i>  | 5.83E-69  | PAV_r1.0chr8 | 20259161 | 20263255 | - |
| <i>Pav_sc0000554.1_g2080.1.mk</i> | <i>PaCSE3</i>  | 3.91E-60  | PAV_r1.0chr2 | 19566233 | 19568808 | + |
| <i>Pav_sc0000084.1_g340.1.mk</i>  | <i>PaCSE4</i>  | 4.29E-59  | PAV_r1.0chr2 | 18603551 | 18607387 | + |
| <i>Pav_sc0001051.1_g150.1.mk</i>  | <i>PaCSE5</i>  | 9.19E-57  | PAV_r1.0chr1 | 24617603 | 24623572 | - |
| <i>Pav_sc0002009.1_g230.1.mk</i>  | <i>PaCSE6</i>  | 7.20E-47  | PAV_r1.0chr4 | 2369295  | 2369849  | - |
| <i>Pav_sc0000800.1_g640.1.mk</i>  | <i>PaCSE7</i>  | 1.35E-42  | PAV_r1.0chr1 | 32919951 | 32927557 | - |
| <i>Pav_sc0001488.1_g300.1.mk</i>  | <i>PaCSE8</i>  | 7.40E-41  | PAV_r1.0chr3 | 9157751  | 9167363  | - |

|                                   |                |          |              |          |          |   |
|-----------------------------------|----------------|----------|--------------|----------|----------|---|
| <i>Pav_co4058231.1_g010.1.mk</i>  | <i>PaCSE9</i>  | 2.62E-35 | PAV_r1.0chr0 | 1.68E+08 | 1.68E+08 | + |
| <i>Pav_sc0000103.1_g1170.1.mk</i> | <i>PaCSE10</i> | 7.32E-13 | PAV_r1.0chr5 | 16512290 | 16518121 | + |

---

Table S3. The information about the *CSE* genes in ten species from the family evolution tree.
